# Supplementary material
Source: Springer Nature journal article supplement (https://www.springermedizin.de/resource/supplementary/12888_2013_1393_MOESM2_ESM.pdf/9480090)
Supplement: MOESM2 [file 9480090]

Recruitment

Recruited persons with  
addictions ( $n=11$ ),  
sponsors ( $n=7$ )

Excluded ( $n=2$ )  
(Refused to participate or  
never showed for treatment)

Phase 1  
data  
collection

**Addicted persons**  
Focus group ( $n=1$ )

**Key informant**  
Interview ( $n=1$ )

**Sponsors**  
Focus group  
( $n=1$ )

Phase 2  
data  
collection

Individual  
interviews ( $n=9$ )

Interview ( $n=1$ )

Individual  
interviews ( $n=7$ )

Field notes from  
phone interviews  
( $n=8$ )

Field notes from  
phone interview  
( $n=1$ )

Focus group  
( $n=1$ )

Phase 3  
data  
collection

Follow-up  
interviews ( $n=6$ )

Field notes from  
phone interview  
( $n=1$ )

**Data**  
2 baseline focus groups  
16 individual interviews with addicted persons and sponsors  
2 interviews with key informant  
10 phone validation checks from memo  
1 validation focus group sponsors  
2 phone validation checks key informant  
6 follow-up interviews  
Total number of observed data points in study:  $n=39$
